# Supplementary material
Source: Springer Nature journal article supplement (https://www.springermedizin.de/resource/supplementary/12958_2009_552_MOESM8_ESM.pdf/9568288)

**A)**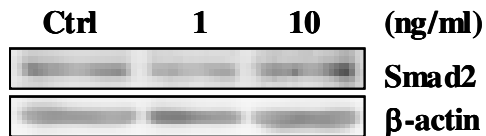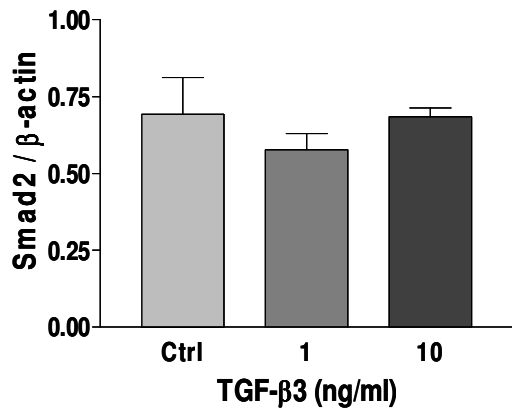**B)**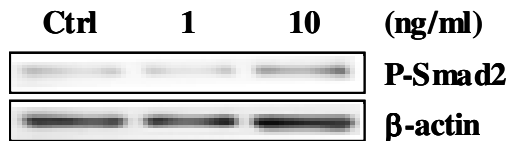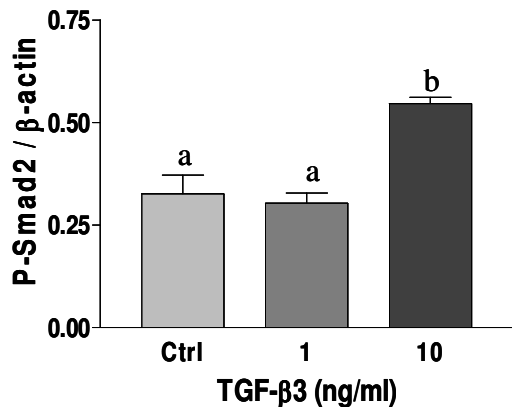

Supplement: MOESM8 [file 9568288]
